# Supplementary material for: Cost-effectiveness analysis of atezolizumab plus bevacizumab versus sorafenib in first line treatment for Chinese subpopulation with unresectable hepatocellular carcinoma
Source: Frontiers journal article supplement (doi:10.3389/fonc.2023.1264417), 2023-11-08
Supplement: Image_1.pdf [file Image_1.pdf]

Supplementary Material - Appendix Figure 1

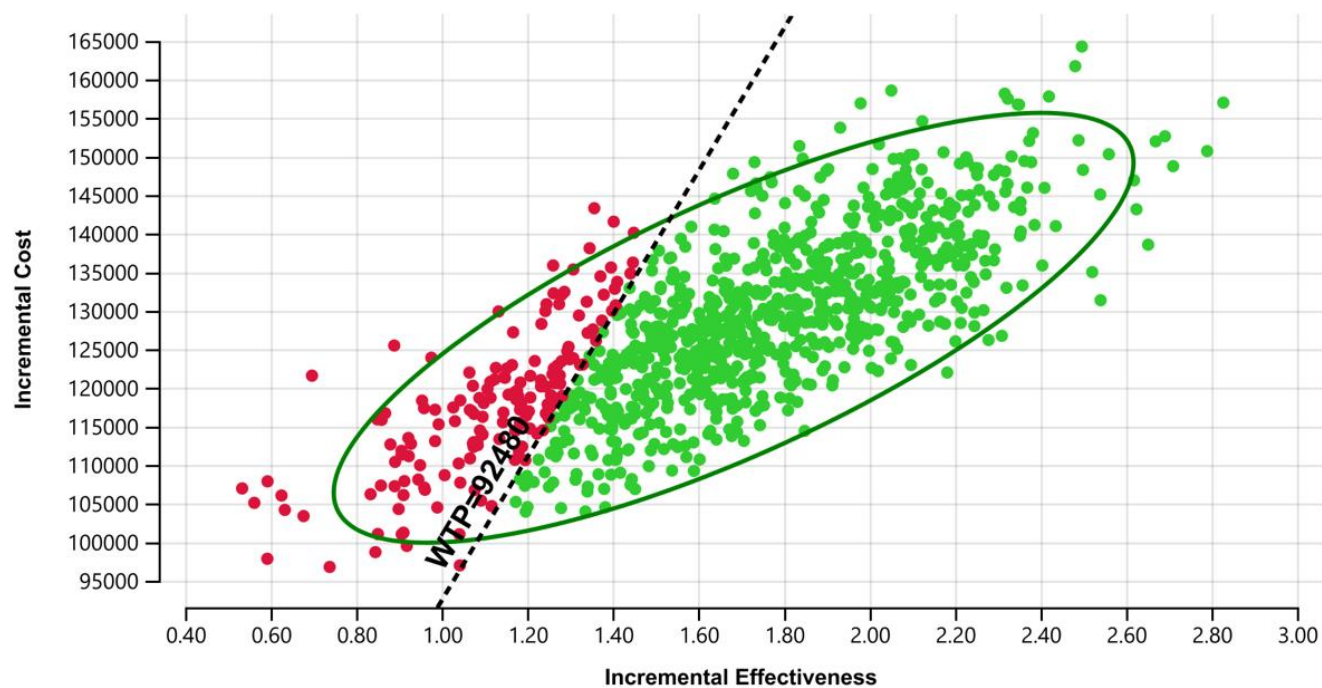

Appendix Figure 1: Incremental cost-effectiveness scatterplot of atezo-bev versus sorafenib. WTP, Willingness to pay
